# Supplementary material
Source: PubMed Central journal article supplement (PMC4654975)
Supplement: NIHMS728466-supplement-1.pdf [file NIHMS728466-supplement-1.pdf]

## SUPPLEMENTAL FIGURES

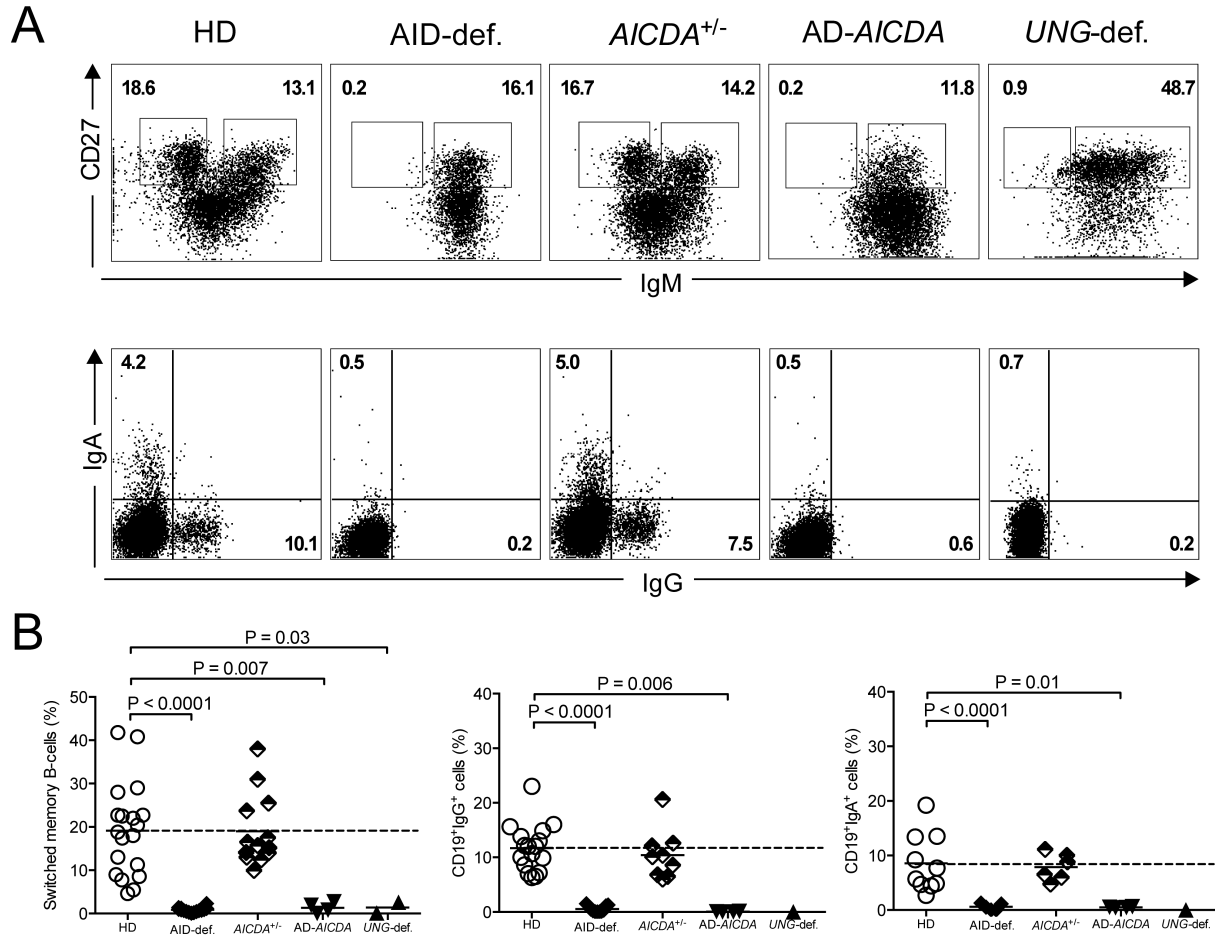

**Figure S1, related to Figure 1. Absence of class-switched memory B cells in AD-*AICDA* and *UNG*-deficient patients resembles that in AID-deficient patients. (A)** Representative dot plots for CD27 and IgM (upper row) or IgG and IgA (lower row) staining on purified CD20<sup>+</sup> B cells. **(B)** Summary of the data shows absence of switched B cells in autosomal recessive *AICDA*-deficient (AID-def.) patients (n=17), autosomal dominant (AD)-*AICDA* patients (n=4) and *UNG*-deficient (*UNG*-def) patients (n=2), compared to healthy donors (HD, n=20) and asymptomatic healthy heterozygotes (*AICDA*<sup>+/-</sup>, n=13).

**A**

New emigrant B cells

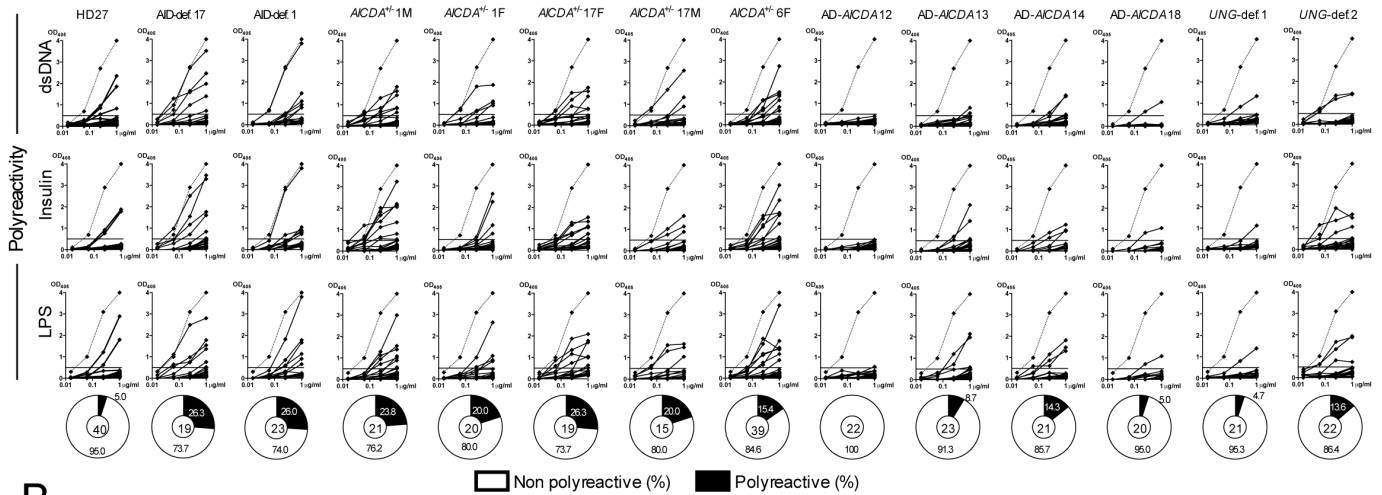

**B**

New emigrant B cells

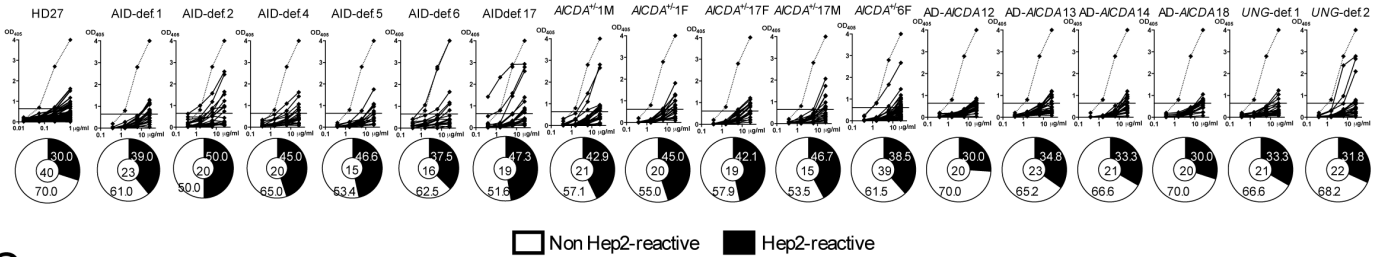

**C**

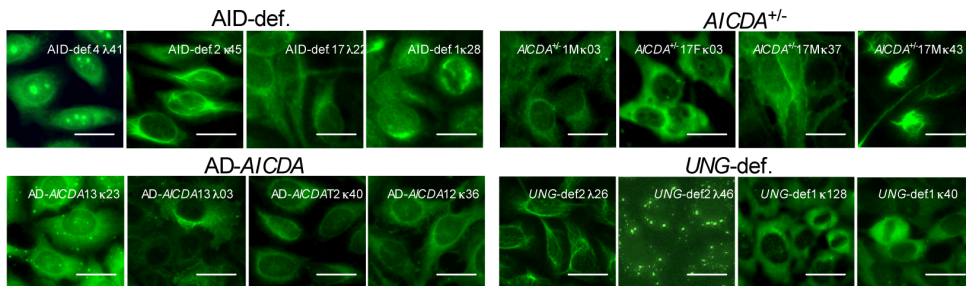

**Figure S2, related to Figure 1. Increased frequencies of autoreactive new emigrant B cells in AID-def. patients and *AICDA*<sup>+/-</sup> healthy carriers.** Recombinant antibodies expressed by CD19<sup>+</sup>CD21<sup>lo</sup>CD10<sup>+</sup>IgM<sup>hi</sup>CD27<sup>-</sup> new emigrant B cells from AID-def. patients, asymptomatic healthy heterozygotes (*AICDA*<sup>+/-</sup>), AD-AICDA and UNG-def. patients were tested by ELISA for polyreactivity against dsDNA, insulin and LPS (A) or HEp-2 reactivity (B). Solid lines show binding for each cloned recombinant antibody. Dotted lines show ED38-positive control. Horizontal lines show cutoff OD405 for positive

reactivity. Antibodies were considered polyreactive when they recognized all three antigens. For each individual, the frequency of polyreactive or HEP-2-reactive B cells are summarized in pie charts, with the number of antibodies tested shown in the center. (C) Autoreactive antibodies show various patterns of HEP-2 staining. Original magnification 40X, scale bar: 10  $\mu$ m. Please see also Figure 1.

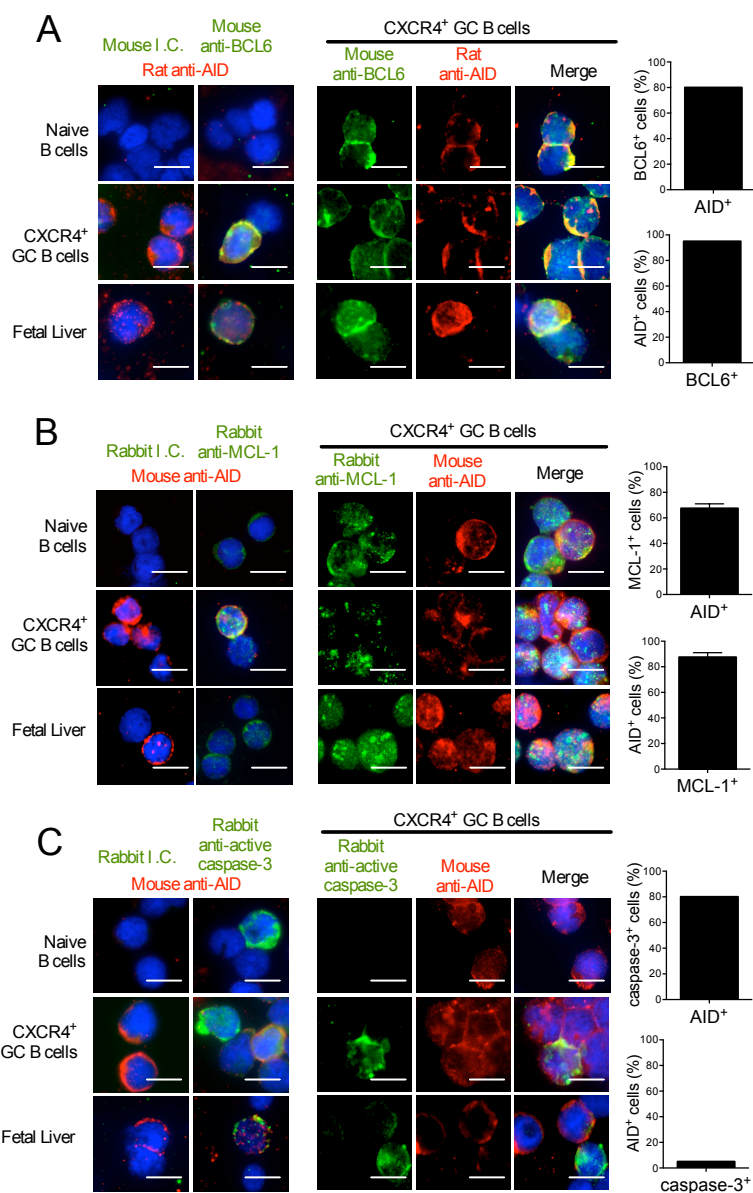

**Figure S3, related to Figure 5. Assessment of anti-BCL6, anti-MCL-1 and anti-active caspase-3 antibody specificity.** Cytospin slides of sorted CD19<sup>+</sup>IgD<sup>+</sup>CD38<sup>-</sup> CXCR4<sup>-</sup> naïve B cells, CD19<sup>+</sup>IgD<sup>-</sup>CD38<sup>+</sup>CXCR4<sup>+</sup> GC B cells and CD34<sup>-</sup>CD19<sup>+</sup> fetal liver B cells were stained for (A) BCL-6, (B) MCL-1, (C) activated caspase-3 or concentration matched isotype control (green) and AID (red) and co-staining was quantified. Data is representative of 2 independent experiments. Original magnification 40X, scale bar: 10  $\mu$ m, Please see also Figure 5.

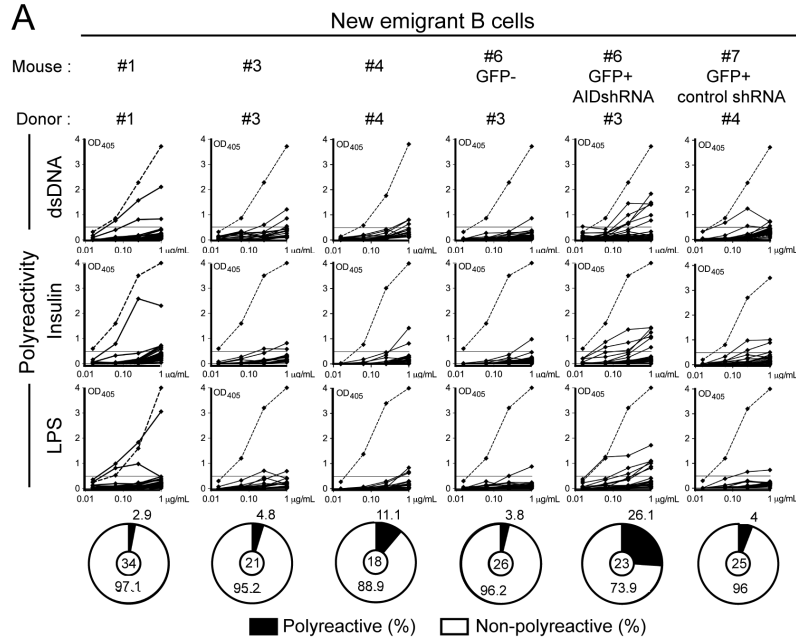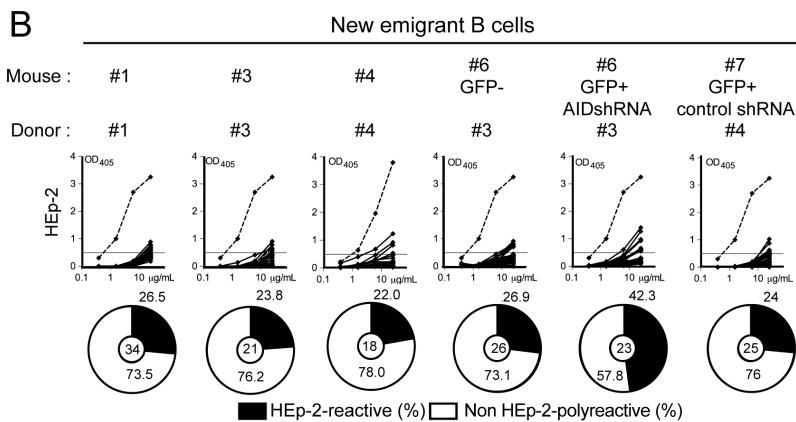

**Figure S4, related to Figures 6 and 7. Central B-cell tolerance requires B-cell intrinsic AID expression.** Antibodies from new emigrant B cells isolated from control humanized mice and sorted GFP- as well as GFP+ fractions expressing AID shRNA or control shRNA were tested by ELISA for reactivity against dsDNA, insulin and LPS (A) and HEP-2 cell lysates (B). Polyreactive antibodies reacted against all 3 antigens. Dotted lines show ED38-positive control. Horizontal lines show cutoff OD405 for positive reactivity. For each mouse, the frequency of reactive and non-reactive clones is summarized in pie charts, with the number of antibodies tested indicated in the center. Please see also Figures 6 and Figure 7.

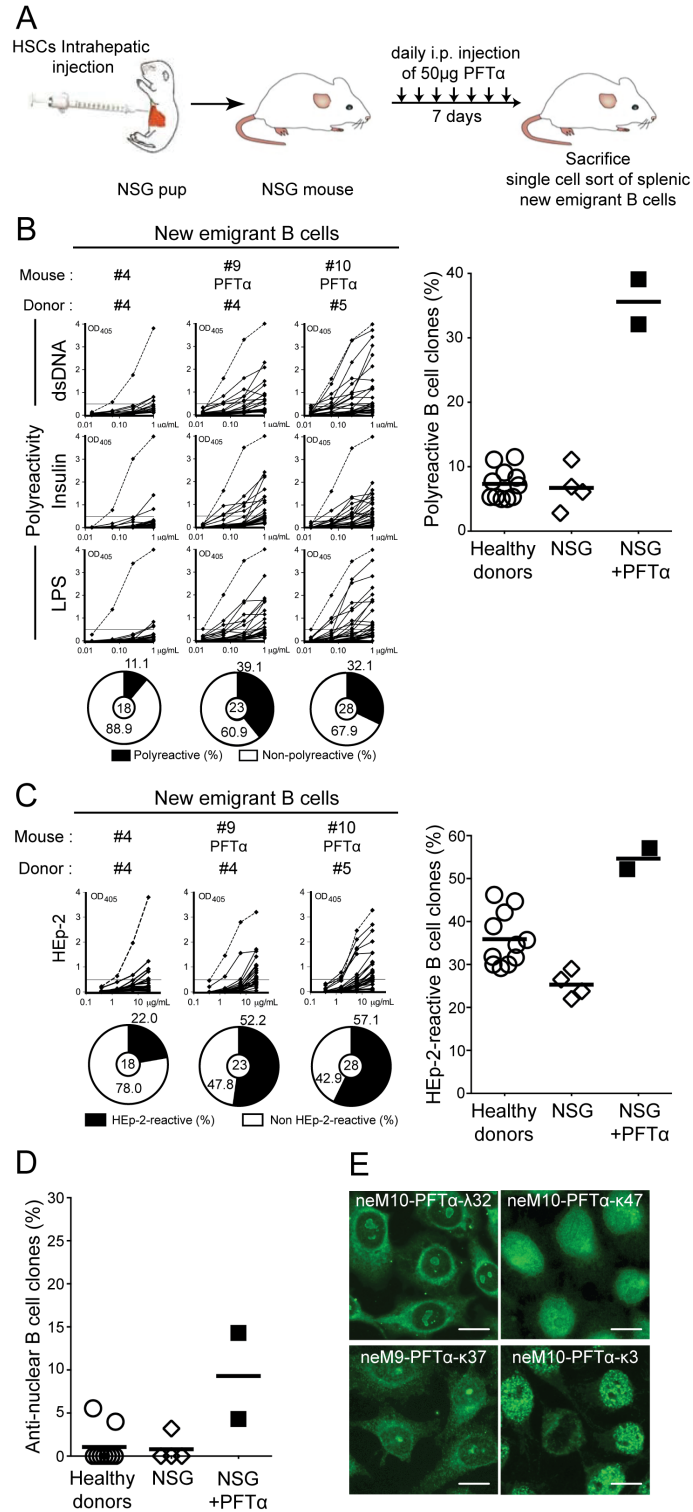

**Figure S5, related to Figures 6 and 7. Defective central B-cell tolerance in PFT $\alpha$ -treated mice. (A) Schematic diagram depicting PFT $\alpha$  injections in NSG humanized**

mice. CD34<sup>+</sup> hematopoietic stem cells (HSCs) were injected in recipients NOD.Cg-Prkdcscid Il2rgtm1Wjl/SzJ mice. Before sacrifice mice were injected with 50µg of PFTα daily for 7 days. Antibodies from new emigrant B cells isolated from one control and two PFTα-treated humanized NSG mice were tested by ELISA for polyreactivity (B) and HEp2-reactivity (C). Dotted lines show ED38-positive control. Horizontal lines show cutoff OD405 for positive reactivity. For each mouse, the frequency of reactive and non-reactive clones is summarized in pie charts, with the number of antibodies tested indicated in the center. Polyreactive antibodies reacted against all 3 antigens (dsDNA, insulin and LPS). The frequencies of polyreactive or HEp2-reactive new emigrant B cells in healthy donors and humanized mice treated or not with PFTα are summarized in the right panels. (D) The frequencies of anti-nuclear new emigrant B cells are compared between healthy donors and humanized mice treated or not with PFTα. (E) Anti-nuclear antibodies expressed by new emigrant B cells isolated from the PFTα-treated mice show various chromatin reactive and non-reactive nuclear reactivity. Original magnification 40X, scale bar 10µm. Please see also Figures 6 and Figure 7.

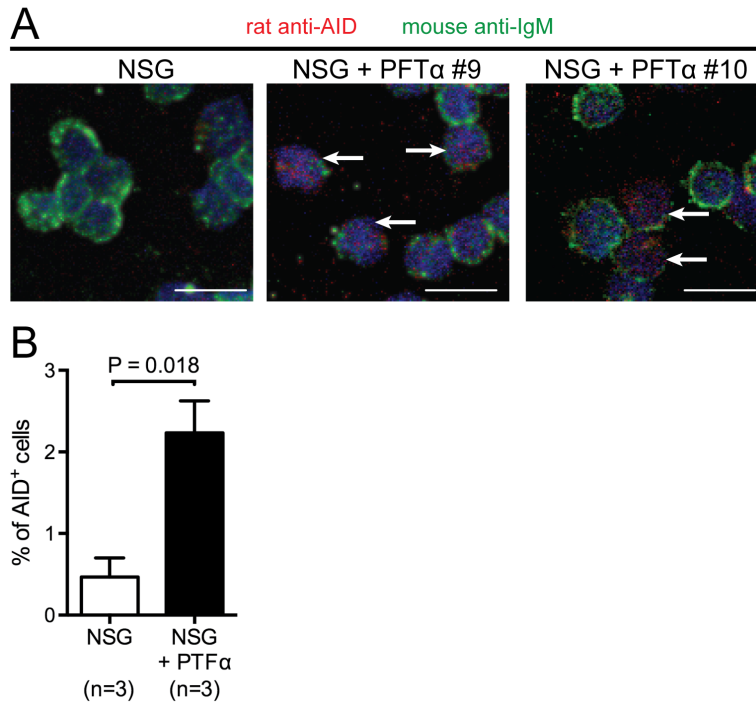

**Figure S6, related to Figures 6 and 7. Increased frequency of AID<sup>+</sup> bone marrow B cells in PFT $\alpha$ -treated mice.** (A) Cytospin slides of CD19<sup>+</sup> purified bone marrow cells were stained for IgM (green) and AID (red) and quantified for co-staining. White arrows show IgM<sup>+</sup>AID<sup>+</sup> cells. Data are representative of 3 controls and 3 PFT $\alpha$ -treated mice. Original magnification 40X. scale bar 50 $\mu$ m (B) 300 CD19<sup>+</sup> B cells (on 3 distinct fields) were analyzed for IgM and AID co-staining in control and PFT $\alpha$ -treated NSG humanized mice. Please see also Figures 6 and Figure 7.



**Table S1, related to Figure 1.** Characteristics of patients with *AICDA* or *UNG* mutations and heterozygote asympi

| Patient number                  | Ethnic group    | Sex | Age at diagnosis (yr) | Current age (yr) | Serum immunoglobins in mg/dl |      |      | Clinical Manifestations                    | Mutation in <i>AICDA</i> gene | Mutation in <i>AID</i>   | Inheritance |
|---------------------------------|-----------------|-----|-----------------------|------------------|------------------------------|------|------|--------------------------------------------|-------------------------------|--------------------------|-------------|
|                                 |                 |     |                       |                  | IgM                          | IgA  | IgG  |                                            |                               |                          |             |
| AID-def.1*                      | Moroccan        | M   | 5                     | 22               | 240                          | <7   | 40   | lymphoid hyperplasia, recurrent infections | 203G>A / 175-184 del          | W68X / H25-E58 del insV  | AR          |
| AID-def.2*                      | Moroccan        | M   | 1                     | 16               | 150                          | <7   | <6   | recurrent infections                       | 203G>A / 175-184 del          | W68X / H25-E58 del insV  | AR          |
| AID-def.4                       | Moroccan        | M   | 1                     | 20               | 100                          | <7   | <6   | lymphoid hyperplasia, recurrent infections | 203G>A / del                  | W68X / 0                 | AR          |
| AID-def.5                       | Turkish         | M   | 11                    | 21               | 1150                         | <5.8 | 264  | lymphoid hyperplasia, recurrent infections | 415A>G / 415A>G               | M139V / M139V            | AR          |
| AID-def.6                       | Pakistani       | M   | 4                     | 4                | 4000                         | <7   | <7   | recurrent infections                       | 394G>C / 394G>C               | A132P / A132P            | AR          |
| AID-def.8                       | French Canadian | F   | 28                    | 60               | 8830                         | <60  | na   | lymphoid hyperplasia, recurrent infections | 334C>T / 334C>T               | R112C / R112C            | AR          |
| AID-def.9                       | French Canadian | F   | 5                     | 26               | 451                          | <30  | 178  | lymphoid hyperplasia, recurrent infections | 334C>T / 334C>T               | R112C / R112C            | AR          |
| AID-def.10                      | French Canadian | F   | 3                     | 22               | 621                          | 40   | 60   | recurrent infections                       | 334C>T / 334C>T               | R112C / R112C            | AR          |
| AID-def.11                      | French Canadian | M   | 2                     | 50               | 6800                         | <60  | na   | recurrent infections                       | 334C>T / 334C>T               | R112C / R112C            | AR          |
| AID-def.17                      | Turkish         | M   |                       | 18               |                              |      |      |                                            | 415A>G / 415 A>G              | M139V / M139V            | AR          |
| AID-def.19                      | Kuwait          | M   | 1                     | 5                | 223                          | < 6  | < 33 | lymphoid hyperplasia, recurrent infections | 254G>A / 254G>A               | S85N / S85N              | AR          |
| AID-def.20                      | Kuweit          | M   | 1.5                   | 16               | 408                          | 40   | <30  | lymphoid hyperplasia, recurrent infections | 254G>A / 254G>A               | S85N / S85N              | AR          |
| AID-def.22*                     | Kuweit          | M   | 3                     | 14               | 1800                         | < 7  | < 7  | lymphoid hyperplasia, recurrent infections | 254G>A / 254G>A               | S85N / S85N              | AR          |
| AID-def.23*                     | Kuweit          | M   | 8.5                   | 13               | 677                          | < 6  | < 33 | lymphoid hyperplasia, recurrent infections | 254G>A / 254G>A               | S85N / S85N              | AR          |
| AID-def.26                      | French          | M   | 6                     | 10               | 140                          | <7   | <7   |                                            |                               | C87R / C147X             | AR          |
| AID-def.27                      | French Canadian | M   |                       |                  |                              |      |      |                                            | 334C>T / 334C>T               | R112C / R112C            | AR          |
| AD- <i>AICDA</i> 12             | French          | F   | 71                    | 76               | 203                          | <7   | 130  | recurrent infections                       | 568C>T / Normal               | R190X / Normal           | AD          |
| AD- <i>AICDA</i> 13             | Japan           | M   |                       |                  |                              |      |      |                                            | 568C>T / Normal               | R190X / Normal           | AD          |
| AD- <i>AICDA</i> 14             | Japan           | F   |                       | 58               |                              |      |      |                                            | 568C>T / Normal               | R190X / Normal           | AD          |
| AD- <i>AICDA</i> 18             | Turkish         | M   |                       | 17               |                              |      |      |                                            | 559del/ Normal                | V186X/ Normal            | AD          |
| <i>AICDA</i> <sup>+/+</sup> 1M  | Moroccan        | F   |                       | adult            |                              |      |      | healthy                                    | 203G>A/ Normal                | W68X/ Normal             | HET         |
| <i>AICDA</i> <sup>+/+</sup> 1F  | Moroccan        | M   |                       | adult            |                              |      |      | healthy                                    | 175-184 del                   | H25-E58 del insV/ Normal | HET         |
| <i>AICDA</i> <sup>+/+</sup> 6F  | Pakistani       | M   |                       | adult            |                              |      |      | adult                                      | 394G>C / Normal               | A132P / Normal           | HET         |
| <i>AICDA</i> <sup>+/+</sup> 6M  | Pakistani       | F   |                       | adult            |                              |      |      | adult                                      | 394G>C / Normal               | A132P / Normal           | HET         |
| <i>AICDA</i> <sup>+/+</sup> 17F | Turkish         | M   |                       | adult            |                              |      |      | healthy                                    | 415 A>G/ Normal               | M139V/ Normal            | HET         |
| <i>AICDA</i> <sup>+/+</sup> 17M | Turkish         | F   |                       | adult            |                              |      |      | healthy                                    | 415 A>G/ Normal               | M139V/ Normal            | HET         |
| <i>AICDA</i> <sup>+/+</sup> 19F | Kuweit          | M   |                       | 35               |                              |      |      | healthy                                    | 254 G>A/ Normal               | S85N/ Normal             | HET         |
| <i>AICDA</i> <sup>+/+</sup> 20F | Kuweit          | M   |                       | 48               |                              |      |      | healthy                                    | 254 G>A/ Normal               | S85N/ Normal             | HET         |
| <i>AICDA</i> <sup>+/+</sup> 22M | Kuweit          | F   |                       | 33               |                              |      |      | healthy                                    | 254 G>A/ Normal               | S85N/ Normal             | HET         |
| <i>AICDA</i> <sup>+/+</sup> 26M | French          | F   |                       | 41               |                              |      |      | healthy                                    |                               | C87R/ Normal             | HET         |
| <i>AICDA</i> <sup>+/+</sup> 27B | French Canadian | M   |                       | 57               |                              |      |      | healthy                                    | 334C>T / Normal               | R112C / Normal           | HET         |
| <i>AICDA</i> <sup>+/+</sup> 27S | French Canadian | F   |                       | 47               |                              |      |      | healthy                                    | 334C>T / Normal               | R112C / Normal           | HET         |
| UNG-def.1                       | USA             | M   | 39                    | 40               | 785                          | <7   | 209  | lymphoid hyperplasia, recurrent infections | 497,498 AT del/497,498 AT del | frameshift               |             |
| UNG-def.2                       | Japan           | F   | 3                     | 12               | 267                          | 25   | <50  | HIGM                                       | T822C/T822C                   | F251S/F251S              |             |
| UNG-def.3                       | French          | M   | 7                     | 26               | 740                          | 48   | 50   | HIGM                                       | 462 C del/639,640 TA del      | frameshift               |             |

\* siblings

AD: autosomal dominant

HET: heterozygote

**Supplementary Table 2, related to Figure 1.** Repertoire and reactivity of antibodies from new emigrant B cells of HD30

| Ig          | HEAVY  |      |    |    |                       | LIGHT  |      |    |             |        | REACTIVITY |       |          |
|-------------|--------|------|----|----|-----------------------|--------|------|----|-------------|--------|------------|-------|----------|
|             | VH     | D    | RF | JH | CDR3(aa)              | Length | Vκ   | Jκ | CDR3(aa)    | Length | Poly       | HEp-2 | Staining |
| neHD30 K3   | 4-39   | 5-12 | 2  | 4  | PSLSGYDYSLDY          | 12     | 3-20 | 3  | QQYGSSPLFT  | 10     | -          | -     | -        |
| neHD30 K4   | 3-15   | /    | /  | 3  | GGGVGAFDI             | 9      | 2-28 | 5  | MQALQTPT    | 8      | -          | -     | c        |
| neHD30 K5   | 3-30-3 | 1-26 | 2  | 6  | QSSPTGGGMDV           | 11     | 1-5  | 2  | QQYNSYSY    | 9      | -          | +     | -        |
| neHD30 K10  | 4-4    | 3-9  | 3  | 5  | VSNHILTNRLFDP         | 14     | 3-20 | 1  | QQYGSSPRT   | 9      | -          | +     | -        |
| neHD30 K12  | 1-2    | 2-15 | 2  | 3  | HPIGYCSGGSCYGGAFDI    | 18     | 1-33 | 4  | QQYDNLPT    | 8      | -          | -     | -        |
| neHD30 K14  | 4-34   | 3-10 | 3  | 2  | KGTMVRGVIIIPHWFYDL    | 18     | 2-28 | 1  | MQALQTPQT   | 9      | -          | +     | -        |
| neHD30 K16  | 3-30   | /    | /  | 6  | EGVSHYYGMDV           | 12     | 2-28 | 4  | MQALQTPPT   | 9      | -          | -     | -        |
| neHD30 K20  | 3-30   | 4-17 | 2  | 6  | DIHRDYGDIETPNYYYYGMDV | 21     | 1-9  | 1  | QQLNSYPLA   | 9      | -          | +     | -        |
| neHD30 K24  | 3-72   | /    | /  | 6  | DNRGMDV               | 7      | 4-1  | 4  | QQYYSTPLT   | 9      | -          | -     | -        |
| neHD30 K26# | 1-18   | 3-16 | 2  | 4  | NYDYIWGSYFTRGGY       | 15     | 1-33 | 3  | QQYDNLPLFT  | 10     |            |       |          |
| neHD30 K43  | 3-9    | 3-22 | 2  | 2  | VDSSGLFGWYFDL         | 13     | 3-20 | 1  | QQYGSSPQT   | 9      | -          | -     | -        |
| neHD30 K45# | 3-15   | 2-15 | 3  | 4  | DPLIVVVVAATRDFDY      | 16     | 1-39 | 2  | QQSYSTPYT   | 9      |            |       |          |
|             | VH     | D    | RF | JH | CDR3(aa)              | Length | Vλ   | Jλ | CDR3(aa)    | Length | Poly       | HEp-2 | Staining |
| neHD30 L7   | 4-59   | /    | /  | 4  | DRNFDY                | 6      | 3-1  | 2  | QAWDSSTAV   | 9      | -          | -     | -        |
| neHD30 L11  | 3-33   | /    | /  | 4  | GGGGGDY               | 7      | 2-14 | 2  | SSFTSITYVW  | 10     | -          | -     | -        |
| neHD30 L19  | 3-11   | 1-7  | 2  | 4  | DRGNNGRNPNWNYFFDY     | 18     | 2-14 | 1  | SSYTSSTLLYV | 12     | -          | +     | -        |
| neHD30 L21# | 3-53   | 4-17 | 2  | 4  | VGRYGDYAYTISRYYFDY    | 20     | 2-14 | 2  | SSYTSSTLGV  | 11     |            |       |          |
| neHD30 L28  | 3-15   | 1-26 | 1  | 6  | AGITKFWELPGYYYGMDV    | 19     | 1-44 | 3  | AAWDDSLNVVW | 11     | -          | -     | -        |
| neHD30 L30  | 3-23   | 2-21 | 3  | 6  | GEGGVVTTQALMDV        | 15     | 1-44 | 2  | AAWDDSLNGVV | 11     | -          | -     | -        |
| neHD30 L42  | 1-69   | 4-4  | 2  | 6  | SDYSNYVLYDYYYYYGMDV   | 19     | 2-8  | 2  | SSYAGSNNLV  | 10     | +          | -     | -        |
|             | VH     | D    | RF | JH | CDR3(aa)              | Length |      |    |             |        |            |       |          |
| neHD30 H2   | 4-34   | 3-10 | 2  | 4  | GQDYYGSGSTADY         | 13     |      |    |             |        |            |       |          |
| neHD30 H29  | 3-23   | 6-13 | 2  | 4  | DEVSSSWLFGY           | 11     |      |    |             |        |            |       |          |
| neHD30 H38  | 3-72   | 3-10 | 1  | 6  | AGSWWFGETRYGMDV       | 15     |      |    |             |        |            |       |          |
| neHD30 H41  | 3-23   | 5-12 | 2  | 4  | VRGRPDGSGYRFDY        | 13     |      |    |             |        |            |       |          |
| neHD30 H44  | 1-69   | 2-15 | 2  | 6  | GSYCSCGSCYSSFYYYYGMDV | 21     |      |    |             |        |            |       |          |
| neHD30 H46  | 3-21   | /    | /  | 6  | DDNLPIDYGMDV          | 12     |      |    |             |        |            |       |          |

RF, reading frame; #, antibody failed to be expressed

-, non-reactive; +, reactive;

c, diffuse cytoplasmic staining; N, nuclear staining; F, cytoplasmic fibers; V, vesicles





|   |   |   |   |   |   |   |   |   |    |    |    |    |    |    |    |    |    |    |    |    |    |    |    |    |    |    |    |    |    |    |    |    |    |    |    |    |    |    |    |    |    |    |    |    |    |    |    |    |    |    |    |    |    |    |    |    |    |    |    |    |    |    |    |    |    |    |    |    |    |    |    |    |    |    |    |    |    |    |    |    |    |    |    |    |    |    |    |    |    |    |    |    |    |    |    |    |    |    |     |
|---|---|---|---|---|---|---|---|---|----|----|----|----|----|----|----|----|----|----|----|----|----|----|----|----|----|----|----|----|----|----|----|----|----|----|----|----|----|----|----|----|----|----|----|----|----|----|----|----|----|----|----|----|----|----|----|----|----|----|----|----|----|----|----|----|----|----|----|----|----|----|----|----|----|----|----|----|----|----|----|----|----|----|----|----|----|----|----|----|----|----|----|----|----|----|----|----|----|----|-----|
| 1 | 2 | 3 | 4 | 5 | 6 | 7 | 8 | 9 | 10 | 11 | 12 | 13 | 14 | 15 | 16 | 17 | 18 | 19 | 20 | 21 | 22 | 23 | 24 | 25 | 26 | 27 | 28 | 29 | 30 | 31 | 32 | 33 | 34 | 35 | 36 | 37 | 38 | 39 | 40 | 41 | 42 | 43 | 44 | 45 | 46 | 47 | 48 | 49 | 50 | 51 | 52 | 53 | 54 | 55 | 56 | 57 | 58 | 59 | 60 | 61 | 62 | 63 | 64 | 65 | 66 | 67 | 68 | 69 | 70 | 71 | 72 | 73 | 74 | 75 | 76 | 77 | 78 | 79 | 80 | 81 | 82 | 83 | 84 | 85 | 86 | 87 | 88 | 89 | 90 | 91 | 92 | 93 | 94 | 95 | 96 | 97 | 98 | 99 | 100 |
|---|---|---|---|---|---|---|---|---|----|----|----|----|----|----|----|----|----|----|----|----|----|----|----|----|----|----|----|----|----|----|----|----|----|----|----|----|----|----|----|----|----|----|----|----|----|----|----|----|----|----|----|----|----|----|----|----|----|----|----|----|----|----|----|----|----|----|----|----|----|----|----|----|----|----|----|----|----|----|----|----|----|----|----|----|----|----|----|----|----|----|----|----|----|----|----|----|----|----|-----|

© 2010 Microsoft Corporation. All rights reserved. Microsoft, the Microsoft Dynamics logo, and "Your business. Your data." are either registered trademarks or trademarks of Microsoft Corporation in the United States and/or other countries.

**Supplementary Table 4, related to Figure 6 and 7.** Repertoire and reactivity of antibodies from new emigrant B cells of NSG mice

| Ig        | HEAVY  |      |    |    |                    |        | LIGHT          |                |              |        | REACTIVITY |      |          |
|-----------|--------|------|----|----|--------------------|--------|----------------|----------------|--------------|--------|------------|------|----------|
|           | VH     | D    | RF | JH | CDR3(aa)           | Length | V <sub>k</sub> | J <sub>k</sub> | CDR3(aa)     | Length | Poly       | HEp2 | Staining |
| neM1 K2   | 1-3    | 1-7  | 2  | 4  | DLELYYFDY          | 9      | 3-20           | 1              | QQYGSSPT     | 8      | -          | -    | -        |
| neM1 K5   | 4-30-2 | 3-10 | 2  | 4  | ISGSYYNY           | 8      | 1-39           | 1              | QQSYSTPWT    | 9      | -          | +    | -        |
| neM1 K8   | 4-59   | 3-9  | 2  | 4  | SPPFDWIYFDY        | 12     | 3-20           | 1              | QQYGSSPWT    | 9      | -          | -    | -        |
| neM1 K9   | 3-73   | 4-23 | 2  | 4  | RYGGNYFDY          | 10     | 3-11           | 4              | QQRSNWPLT    | 9      | -          | +    | -        |
| neM1 K10  | 3-15   | 1-26 | 1  | 3  | QTEWELDAFDI        | 11     | 3-20           | 4              | QQYGSSPPLT   | 10     | -          | -    | -        |
| neM1 K11  | 3-74   | 3-10 | 2  | 6  | DPGKGYGSGSYYYYGMDV | 20     | 1-6            | 2              | LQDYNYPYT    | 9      | -          | -    | -        |
| neM1 K16  | 4-30-2 | /    | /  | 3  | TNEPNAFDI          | 9      | 2-28           | 4              | MQALQTPLT    | 9      | -          | -    | -        |
| neM1 K22  | 4-4    | 3-22 | 2  | 3  | DRADYYDSSGYYYAFDI  | 17     | 1-17           | 4              | LQHNSYPPT    | 9      | -          | -    | -        |
| neM1 K23  | 3-7    | 1-26 | 2  | 6  | NRPPGAINYYGMDV     | 14     | 3-11           | 1              | QQRSNWPWT    | 9      | -          | -    | -        |
| neM1 K25  | 4-34   | 1-26 | 3  | 4  | GGGATEY            | 7      | 1-17           | 1              | LQHNSYLWT    | 9      | -          | -    | -        |
| neM1 K32  | 4-59   | /    | /  | 3  | THPQSDAFDI         | 10     | 2-30           | 4              | MQGTHWPLT    | 9      | -          | +    | -        |
| neM1 K33# | 3-7    | 3-10 | 3  | 3  | ILGGITMVRGAEDAFDI  | 17     | 3-20           | 1              | QQYGSSPRT    | 9      |            |      |          |
| neM1 K37  | 3-30   | 3-10 | 1  | 4  | EKGWFGELEGLAIDY    | 15     | 3-15           | 1              | QQYNNWPQT    | 9      | -          | -    | -        |
| neM1 K38  | 4-34   | 7-27 | 2  | 2  | GLTGDSGTDWYFDL     | 14     | 1-39           | 4              | QQSYSTPLT    | 9      | -          | -    | -        |
| neM1 K40  | 4-39   | 6-13 | 2  | 4  | HPYSSSFYD          | 9      | 3-20           | 2              | QQYGSSYT     | 8      | -          | -    | -        |
| neM1 K42  | 3-33   | 3-10 | 2  | 6  | DPRLGSGSYYYYGMDV   | 16     | 1-39           | 3              | QQSYSTPFT    | 9      | -          | +    | -        |
| neM1 K43# | 4-30-4 | 7-27 | 2  | 4  | NKLNWGLDY          | 9      | 1-5            | 1              | QQYNSYSPWT   | 10     |            |      |          |
| neM1 K45  | 4-4    | 7-27 | 2  | 5  | GWGFGNWFDP         | 10     | 3-20           | 2              | QQYGSSPPYT   | 10     | -          | -    | -        |
| neM1 K46  | 4-59   | /    | /  | 4  | SFSRLASFDY         | 10     | 3-20           | 1              | QQYGSSLGT    | 9      | -          | -    | -        |
| neM1 K48  | 4-59   | /    | /  | 4  | VGGRGGDFDY         | 10     | 1-33           | 3              | QQYDNLPRVT   | 10     | -          | -    | -        |
|           | VH     | D    | RF | JH | CDR3(aa)           | Length | V <sub>λ</sub> | J <sub>λ</sub> | CDR3(aa)     | Length | Poly       | Hep2 | Staining |
| neM1 L1   | 3-30   | 6-13 | 2  | 4  | SGSSWYFDY          | 10     | 2-14           | 2              | SSYTSSSTV    | 9      | -          | -    | -        |
| neM1 L3   | 1-69   | /    | /  | 4  | VMAVYFDY           | 9      | 1-40           | 1              | QSYDSSLGGYV  | 11     | +          | +    | -        |
| neM1 L6   | 3-30-3 | 3-16 | 2  | 4  | GPSRGGEVFDY        | 11     | 3-21           | 3              | QVWDSSSDQNWV | 12     | -          | -    | -        |
| neM1 L7   | 5-51   | 3-22 | 2  | 4  | LRIPDYDSSGYYFDY    | 15     | 2-8            | 3              | SSYAGSNNLV   | 10     | -          | -    | -        |
| neM1 L12  | 4-4    | /    | /  | 4  | GSIPSDYFDY         | 11     | 3-25           | 2              | QSADSSGTYPV  | 11     | -          | -    | -        |
| neM1 L13# | 1-69   | 6-13 | 2  | 5  | TIYSSSWYWFDP       | 12     | 5-37           | 2              | MIWPSNAYVV   | 10     |            |      |          |
| neM1 L14  | 3-30   | 3-22 | 2  | 2  | DYYDSSGYYYWYFDL    | 15     | 1-44           | 2              | AAWDDSLNGPV  | 11     | -          | +    | +        |
| neM1 L24  | 3-13   | 6-13 | 2  | 3  | GGRDSSWYIAFDI      | 13     | 2-23           | 1              | CSYAGSSTYV   | 10     | -          | +    | -        |
| neM1 L26  | 1-3    | 7-27 | 2  | 5  | GQTTNLGMGNWFDP     | 15     | 1-40           | 2              | QSYDSSLGGVV  | 11     | -          | -    | -        |
| neM1 L27  | 3-23   | 2-15 | 2  | 3  | DPLSRYCSGGSCYGAFDI | 19     | 1-44           | 2              | AAWDDSLNGHV  | 12     | -          | -    | -        |
| neM1 L28  | 1-18   | 6-19 | 3  | 4  | GIAVAGYFDY         | 10     | 2-8            | 2              | SSYAGSNNLV   | 10     | -          | -    | -        |
| neM1 L30  | 3-7    | /    | /  | 4  | DRLGSFDY           | 8      | 1-47           | 3              | AAWDDSLGGVV  | 11     |            |      |          |
| neM1 L31  | 3-33   | 3-9  | 2  | 4  | DAALRYFDWLLDY      | 13     | 2-14           | 1              | SSYTSSSTLV   | 10     | -          | -    | -        |
| neM1 L34  | 3-7    | /    | /  | 4  | DLVGIRATDY         | 10     | 1-51           | 1              | GTWDSSLSAYV  | 11     | -          | +    | -        |
| neM1 L35  | 3-30   | 6-13 | 3  | 1  | DVNAAAGNRAYFQH     | 14     | 3-21           | 1              | QVWDSSSDHYV  | 11     | -          | -    | -        |
| neM1 L36  | 3-30   | 1-26 | 2  | 4  | DGDSGSYFDY         | 10     | 2-23           | 2              | CSYAGSSTYVV  | 11     | -          | -    | -        |
| neM1 L39  | 3-30-3 | 7-27 | 1  | 3  | VCSPELGQWIDI       | 12     | 3-21           | 2              | QVWDSSSDHV   | 11     | -          | +    | -        |
| neM1 L41  | 3-15   | 3-16 | 2  | 3  | DWGTRAFDI          | 9      | 1-51           | 3              | GTWDSSLSAGV  | 11     | -          | -    | -        |
|           | VH     | D    | RF | JH | CDR3(aa)           | Length |                |                |              |        |            |      |          |
| neM1 H4   | 3-64   | 6-19 | 3  | 4  | GIVAVAGNLDY        | 11     |                |                |              |        |            |      |          |

**Supplementary Table 5, related to Figure 6 and 7.** Repertoire and reactivity of antibodies from new emigrant B cells of AIDshRNA treated I

| Ig            | HEAVY  |      |    |    |                      |        | LIGHT |    |              |        | REACTIVITY |      |          |
|---------------|--------|------|----|----|----------------------|--------|-------|----|--------------|--------|------------|------|----------|
|               | VH     | D    | RF | JH | CDR3(aa)             | Length | Vκ    | Jκ | CDR3(aa)     | Length | Poly       | Hep2 | Staining |
| neGFP+M5 K3   | 1-46   | 4-23 | 2  | 1  | KPNYGANQYFQH         | 12     | 3-20  | 3  | QQYGSSPLT    | 9      | +          | +    | n        |
| neGFP+M5 K10  | 3-7    | 5-5  | 2  | 3  | DSVRYSYGTDAFDI       | 14     | 1-37  | 4  | QRTYNAPLT    | 9      | -          | -    | -        |
| neGFP+M5 K11  | 3-30   | 5-5  | 3  | 5  | DRDTAMVTWFDP         | 12     | 1-5   | 1  | QQYNSYSWT    | 9      | +          | -    | -        |
| neGFP+M5 K14  | 3-7    | 6-19 | 2  | 4  | APLRWEYSSGWYGDY      | 15     | 3-15  | 1  | QQYNNWPPWT   | 10     | -          | +    | -        |
| neGFP+M5 K16# | 1-2    | 6-13 | 2  | 4  | SPRSWYDY             | 8      | 3-20  | 5  | QQYGSSPTT    | 9      |            |      |          |
| neGFP+M5 K18  | 5-51   | 6-13 | 2  | 3  | YSSSWWGAFDI          | 11     | 2-30  | 1  | MQGTHWPPT    | 9      | +          | -    | -        |
| neGFP+M5 K19  | 3-30-3 | 1-26 | 1  | 6  | DRENGGAWERYLGMDV     | 16     | 3-20  | 1  | QQYGSSPT     | 8      | +          | +    | -        |
| neGFP+M5 K20  | 3-15   | 1-7  | 2  | 2  | GPNYPNQSRYFDL        | 13     | 3D-15 | 4  | QQYNNWPPAPFT | 12     | +          | +    | n        |
| neGFP+M5 K21  | 3-33   | 2-21 | 2  | 4  | EAYCGGDCYFPWDY       | 14     | 1-5   | 2  | QQYNSYSHT    | 9      | -          | +    | c        |
| neGFP+M5 K22  | 5-a    | 6-6  | 2  | 3  | PHEYSSSDAFDI         | 13     | 1-5   | 1  | QQYNSYST     | 8      | -          | +    | -        |
| neGFP+M5 K23  | 4-61   | 4-17 | 2  | 4  | ESGDYFFDY            | 9      | 4-1   | 2  | QQYYSTPYT    | 9      | -          | -    | -        |
| neGFP+M5 K25# | 4-39   | 6-13 | 3  | 3  | WYGAFDI              | 7      | 3-15  | 1  | QQYNNWLTWT   | 10     |            |      |          |
| neGFP+M5 K27  | 4-61   | /    | /  | 3  | KPNIPDAFDI           | 10     | 1-39  | 1  | QSYSTPGP     | 9      | -          | -    | -        |
| neGFP+M5 K28  | 1-69   | 3-22 | 2  | 4  | DYYDSSGYPPFDY        | 13     | 3-20  | 2  | QQYGSSPYT    | 9      | +          | -    | -        |
| neGFP+M5 K29  | 3-30   | 4-17 | 2  | 4  | DLKVRTYDYGDNYY       | 16     | 1-17  | 1  | LQHNSYPWT    | 9      | -          | +    | -        |
| neGFP+M5 K31  | 4-34   | 3-22 | 2  | 3  | GVYYDSSGYSNDAFDI     | 16     | 3-11  | 2  | QQRSNWYT     | 8      | -          | -    | -        |
| neGFP+M5 K33  | 4-34   | 6-13 | 3  | 5  | GKGIAAGYNWFDP        | 14     | 3-15  | 1  | QQYNNWLTWT   | 10     | +          | +    | -        |
| neGFP+M5 K34  | 3-33   | 3-22 | 2  | 4  | DAHYYDSSGYPPAYFDY    | 18     | 1-5   | 3  | QQYNSYLFT    | 9      | -          | +    | -        |
| neGFP+M5 K38  | 3-33   | /    | /  | 4  | GQTVFDY              | 7      | 3-15  | 2  | QQYNNWPYT    | 9      | -          | +    | n        |
| neGFP+M5 K42  | 4-34   | 3-16 | 1  | 4  | GPAGELSLDY           | 10     | 3-11  | 5  | QQRSNWLPIT   | 10     | -          | +    | -        |
| neGFP+M5 K48  | 3-33   | 3-16 | 3  | 4  | DLYRVTFGGAIDY        | 13     | 1-5   | 2  | QQYNSYPWT    | 9      | -          | +    | -        |
|               | VH     | D    | RF | JH | CDR3(aa)             | Length | Vλ    | Jλ | CDR3(aa)     | Length | Poly       | Hep2 | Staining |
| neGFP+M5 L5   | 3-23   | 4-17 | 2  | 2  | DGYGDYIYWFYFDL       | 12     | 1-40  | 2  | QSYDSSLSGSV  | 11     | -          | -    | -        |
| neGFP+M5 L7   | 3-64   | /    | /  | 4  | WAGLGSYFFDY          | 11     | 3-21  | 2  | QVWDSSSDHVV  | 11     | -          | -    | -        |
| neGFP+M5 L8   | 3-15   | 6-13 | 2  | 6  | DRDSSSWTTYYYYYYMDV   | 18     | 2-14  | 1  | SSYTSSSTLV   | 10     | -          | -    | n        |
| neGFP+M5 L9#  | 3-7    | 6-19 | 2  | 3  | GRSSGWFAFDI          | 12     | 3-21  | 2  | QVWDSSSDHPV  | 11     |            |      |          |
| neGFP+M5 L12  | 3-7    | 3-10 | 2  | 6  | DTTYYGSGSYSDYYYYYMDV | 21     | 1-51  | 2  | GTWDSSLSAGV  | 11     | -          | +    | -        |
| neGFP+M5 L15  | 4-34   | 3-22 | 2  | 4  | GYSDSSGVDY           | 10     | 2-14  | 3  | SSYTSSSTLG   | 10     | -          | -    | n        |
| neGFP+M5 L24  | 3-64   | 3-3  | 2  | 2  | DSSKDFWSGPWYFDL      | 15     | 2-14  | 2  | SSYTSSSTLVV  | 11     | -          | -    | -        |
| neGFP+M5 L30  | 1-3    | 7-27 | 2  | 4  | DSLGLDLPFDY          | 11     | 2-11  | 2  | CSYAGSYTLV   | 10     | -          | +    | -        |
| neGFP+M5 L32# | 3-30   | 6-19 | 2  | 4  | VTSYSSGWYIGIDY       | 13     | 2-14  | 2  | SSYTSSSTLV   | 10     |            |      |          |
| neGFP+M5 L37  | 5-51   | 6-13 | 3  | 4  | GIAAAGPFYD           | 10     | 1-44  | 1  | AAWDDSHYV    | 9      | -          | -    | -        |
| neGFP+M5 L38  |        |      |    |    | see Kappa            |        | 3-25  | 2  | QSADSSGTYYV  | 11     | -          | +    | -        |
| neGFP+M5 L39  | 3-30   | /    | /  | 6  | FHGDYYGMDV           | 10     | 3-21  | 1  | QVWDSSSDHYV  | 11     | +          | +    | -        |
| neGFP+M5 L40  | 3-30   | 6-19 | 3  | 4  | DHHRIVADLFDY         | 13     | 3-21  | 2  | QVWDSSSDHVV  | 11     | -          | -    | -        |
| neGFP+M5 L41  | 4-34   | 2-8  | 2  | 4  | HRNCTNGVCYFDY        | 13     | 2-8   | 2  | SSYAGSNNVV   | 10     | -          | -    | -        |
| neGFP+M5 L43  | 4-4    | 3-3  | 1  | 3  | RFLEWLECAFDI         | 12     | 1-51  | 2  | GTWDSSLSAVV  | 11     | -          | +    | -        |
| neGFP+M5 L46# | 1-3    | 6-13 | 3  | 6  | DGELNAAAAGYYYYGMDV   | 18     | 1-47  | 3  | AAWDDSLSGWV  | 11     |            |      |          |
| neGFP+M5 L13  |        |      |    |    |                      |        | 2-14  | 3  | SSYTSSSIWV   | 10     |            |      |          |
|               | VH     | D    | RF | JH | CDR3(aa)             | Length |       |    |              |        |            |      |          |
| neGFP+M5 H6   | 3-11   | 6-13 | 2  | 4  | VYDSSTYYFDY          | 11     |       |    |              |        |            |      |          |
| neGFP+M5 H45  | 1-18   | 6-13 | 3  | 4  | DLAAAGHGGY           | 10     |       |    |              |        |            |      |          |

**Supplementary Table 6, related to Figure 6 and 7.** Repertoire and reactivity of antibodies from new emigrant B cells of PFTα treated NSG mic

| Ig             | HEAVY  |      |    |    |                           | LIGHT  |      |    |              | REACTIVITY |      |      |          |
|----------------|--------|------|----|----|---------------------------|--------|------|----|--------------|------------|------|------|----------|
|                | VH     | D    | RF | JH | CDR3(aa)                  | Length | Vκ   | Jκ | CDR3(aa)     | Length     | Poly | Hep2 | Staining |
| neM9-PFTa K3   | 5-10   | 2-2  | 2  | 4  | HVGYCSSTSCDDY             | 13     | 1-17 | 1  | LQHNSYPWT    | 9          | +    | -    | -        |
| neM9-PFTa K8   | 3-7    | 2-8  | 2  | 2  | VVDLPILGYCTGGVCDKRGWYFDL  | 24     | 3-20 | 2  | QQYGSSPQYT   | 10         | +    | +    | -        |
| neM9-PFTa K16  | 4-39   | 3-10 | 2  | 5  | TWRGSGSYNNATTKDWFDP       | 20     | 3-15 | 1  | QQYNNWPQT    | 9          | +    | +    | -        |
| neM9-PFTa K17  | 3-23   | 2-2  | 2  | 4  | EDCSSTSCFDYFDY            | 14     | 3-20 | 3  | QQYGSSPLFT   | 11         | -    | -    | -        |
| neM9-PFTa K20  | 3-23   | 6-13 | 3  | 3  | DRSIAAAGTGAAFDI           | 15     | 1-5  | 1  | QQYNSYFWT    | 9          | -    | +    | -        |
| neM9-PFTa K27  | 3-48   | /    | /  | 4  | SFLGLKWVDY                | 10     | 3-15 | 1  | QQYNNWPQT    | 9          | +    | +    | c        |
| neM9-PFTa K36  | 4-34   | 7-27 | 2  | 6  | EVTNWGSYYMDV              | 13     | 1-8  | 4  | QQYYSYPRS    | 9          | +    | +    | -        |
| neM9-PFTa K37  | 3-7    | 2-15 | 2  | 4  | SSGGYCSGGSCYTLPYYFDY      | 20     | 3-20 | 2  | QQYGSSPRYT   | 10         | -    | +    | n        |
| neM9-PFTa K41  | 1-69   | 2-21 | 2  | 3  | GAYCGGDCNDAFDI            | 14     | 3-20 | 2  | QQCGSSPYT    | 9          | -    | -    | -        |
| neM9-PFTa K42  | 4-39   | 6-13 | 3  | 2  | DVLLAAAGNDWYFDL           | 15     | 1-5  | 2  | QQYNSYSRT    | 9          | +    | -    | -        |
| neM9-PFTa K44  | 3-7    | 5-12 | 3  | 4  | DGGRVATRATSFYD            | 14     | 3-15 | 2  | QQYNNWPPMYT  | 11         | -    | -    | -        |
| neM9-PFTa K45  | 3-23   | /    | /  | 4  | DSGWGAFDY                 | 9      | 1-39 | 4  | QQSYSTPQRDLT | 13         | +    | +    | -        |
|                | VH     | D    | RF | JH | CDR3(aa)                  | Length | Vλ   | Jλ | CDR3(aa)     | Length     | Poly | Hep2 | Staining |
| neM9-PFTa L1   | 3-30   | 4-17 | 2  | 4  | DEGLLAYFDDYGDYCPGDY       | 19     | 1-47 | 3  | AAWDDSLSGWV  | 11         | -    | +    | -        |
| neM9-PFTa L3   |        |      |    |    | see κ-chain               | 11     | 2-11 | 3  | CSYAGSYTWV   | 10         |      |      |          |
| neM9-PFTa L6   | 1-2    | 6-6  | 2  | 4  | DRAPFRSSSPHFYD            | 14     | 3-21 | 2  | QVWDSSSDHVV  | 11         | -    | +    | -        |
| neM9-PFTa L7   | 1-18   | /    | /  | 4  | ASTRYGADY                 | 9      | 1-51 | 3  | GTWDSSLSAWV  | 11         | -    | +    | -        |
| neM9-PFTa L9   | 3-23   | /    | /  | 4  | VPYPQYYFDY                | 10     | 3-25 | 2  | QSADSSGTSVV  | 11         | -    | -    | -        |
| neM9-PFTa L10  | 3-23   | 2-2  | 3  | 3  | LVVPAAMRDAFDI             | 13     | 2-8  | 2  | SSYAGSNIVV   | 10         | -    | -    | -        |
| neM9-PFTa L11  | 3-23   | 2-21 | 2  | 5  | GAYCGGDCLLDWFDP           | 15     | 2-11 | 1  | CSYAGSYTYV   | 10         | +    | +    | -        |
| neM9-PFTa L12# | 4-34   | 3-10 | 2  | 4  | GGDYGSGSYLFNRIQGSKGFYYFDY | 28     | 2-23 | 1  | CSYAGSYV     | 8          |      |      |          |
| neM9-PFTa L18  | 3-23   | 6-13 | 3  | 4  | QPAAGDY                   | 7      | 2-14 | 2  | SSYTSSTVV    | 10         | -    | -    | -        |
| neM9-PFTa L22  | 1-18   | 7-27 | 1  | 4  | VLLPIGLGMDY               | 11     | 1-51 | 1  | GTWDSSLSAYV  | 11         |      |      |          |
| neM9-PFTa L24  | 4-61   | 3-10 | 3  | 4  | EARVRRQGVIITSPYFDY        | 18     | 1-44 | 1  | AAWDDSLNGPV  | 11         | -    | +    | -        |
| neM9-PFTa L25# | 3-53   | 6-13 | 2  | 6  | SGSSSSLHYYYMDV            | 15     | 2-23 | 1  | CSYAGSSPNYV  | 11         |      |      |          |
| neM9-PFTa L30# | 1-3    | 6-6  |    | 6  | GTDIAARPSEGYYYYGMDV       | 19     | 2-14 | 1  | SSYTSSTYV    | 10         |      |      |          |
| neM9-PFTa L33# | 4-34   | 2-2  | 3  | 4  | VTDIVVPAAPRSPPCFDY        | 19     | 1-51 | 2  | GTWDSSLSAVV  | 11         |      |      |          |
| neM9-PFTa L45  |        |      |    |    | see κ-chain               | 13     | 1-40 | 2  | QSYDSSLSGSV  | 11         | -    | -    | -        |
| neM9-PFTa L46  | 3-30   | 4-4  | 2  | 4  | EGDYSNLAWRRYFDY           | 15     | 2-8  | 1  | SSYAGSNIVV   | 10         | -    | -    | -        |
| neM9-PFTa L47  | 3-11   | 3-10 | 1  | 5  | GGGVLFRELLNNWFDP          | 17     | 2-14 | 2  | SSYTSSTVV    | 10         | +    | +    | -        |
|                | VH     | D    | RF | JH | CDR3(aa)                  | Length | Vκ   | Jκ | CDR3(aa)     | Length     | Poly | HEp2 | Staining |
| neM10-PFTa K3  | 3-21   | 1-26 | 2  | 4  | EQNSGSYYY                 | 9      | 1-39 | 1  | QQSYSTTWT    | 9          | +    | +    | n        |
| neM10-PFTa K8  | 3-30-3 | 1-26 | 2  | 4  | VCVGSYYFDY                | 10     | 1-39 | 3  | QQSYSTPFT    | 9          | +    | +    | -        |
| neM10-PFTa K9  | 1-2    | 6-13 | 3  | 3  | DLRIAAAGDAFDI             | 13     | 3-15 | 5  | QQYNNWPIT    | 9          | -    | +    | -        |
